# Supplementary material for: Differential Expression Profiles of lncRNA Following LPS-Induced Inflammation in Bovine Mammary Epithelial Cells
Source: Frontiers journal article supplement (doi:10.3389/fvets.2021.758488), 2021-10-29
Supplement: Data_Sheet_1.ZIP [file Data_Sheet_1.ZIP]

## Sheet: TCONS_00039271
lncRNA_ID	lncRNA_Gene_ID	lncRNA_Gene_Symbol	Status	mRNA_Gene_ID	mRNA_Gene_Symbol	Pearson_correlation	Pvalue
TCONS_00039271	XLOC_023768	XLOC_023768	Novel_lncRNA	ENSBTAG00000020097	PERP	0.967298	2.01676e-05
TCONS_00039271	XLOC_023768	XLOC_023768	Novel_lncRNA	ENSBTAG00000005664	YWHAE	0.95485	6.1604e-05
TCONS_00039271	XLOC_023768	XLOC_023768	Novel_lncRNA	ENSBTAG00000001700	CDC42	-0.982188	2.44039e-06
TCONS_00039271	XLOC_023768	XLOC_023768	Novel_lncRNA	ENSBTAG00000003043	GNG2	-0.958704	4.52522e-05
TCONS_00039271	XLOC_023768	XLOC_023768	Novel_lncRNA	ENSBTAG00000005359	TGFB2	0.971654	1.22811e-05
TCONS_00039271	XLOC_023768	XLOC_023768	Novel_lncRNA	ENSBTAG00000013755	ITGB5	-0.962064	3.37357e-05
TCONS_00039271	XLOC_023768	XLOC_023768	Novel_lncRNA	ENSBTAG00000008136	SNW1	-0.960129	4.00771e-05
TCONS_00039271	XLOC_023768	XLOC_023768	Novel_lncRNA	ENSBTAG00000013489	CYP27A1	-0.962911	3.11987e-05
TCONS_00039271	XLOC_023768	XLOC_023768	Novel_lncRNA	ENSBTAG00000031861	RHEB	0.951159	8.08112e-05
TCONS_00039271	XLOC_023768	XLOC_023768	Novel_lncRNA	ENSBTAG00000006495	GNB2	-0.989101	4.40289e-07
TCONS_00039271	XLOC_023768	XLOC_023768	Novel_lncRNA	ENSBTAG00000010109	CDK1	0.952673	7.24877e-05
TCONS_00039271	XLOC_023768	XLOC_023768	Novel_lncRNA	ENSBTAG00000018593	PSENEN	-0.95833	4.66852e-05
TCONS_00039271	XLOC_023768	XLOC_023768	Novel_lncRNA	ENSBTAG00000007061	PPP2R5B	-0.983579	1.83872e-06
Chromosome	lncRNA_ID	lncRNA_Gene_ID	lncRNA_Gene_Symbol	lncRNA_Status	lncRNA_Start	lncRNA_End	lncRNA_Strand	Gene_Id	Gene_Symbol	Gene_Start	Gene_End	Gene_Strand	Distance	Location
15	TCONS_00039271	XLOC_023768	XLOC_023768	Novel_lncRNA	38367178	38397239	-	ENSBTAG00000011905	RRAS2	38367193	38444339	+	-30046	antisense

## Sheet: TCONS_00139850
lncRNA_ID	lncRNA_Gene_ID	lncRNA_Gene_Symbol	Status	mRNA_Gene_ID	mRNA_Gene_Symbol	Pearson_correlation	Pvalue
TCONS_00139850	XLOC_081030	XLOC_081030	Novel_lncRNA	ENSBTAG00000024869	CX3CL1	0.958602	4.56401e-05
TCONS_00139850	XLOC_081030	XLOC_081030	Novel_lncRNA	ENSBTAG00000016515	EFNA5	0.975844	7.04476e-06
TCONS_00139850	XLOC_081030	XLOC_081030	Novel_lncRNA	ENSBTAG00000006143	CREB3L1	0.990728	2.50448e-07
TCONS_00139850	XLOC_081030	XLOC_081030	Novel_lncRNA	ENSBTAG00000026403	CREBBP	0.96506	2.53696e-05
TCONS_00139850	XLOC_081030	XLOC_081030	Novel_lncRNA	ENSBTAG00000003015	SESN1	0.979754	3.81209e-06
TCONS_00139850	XLOC_081030	XLOC_081030	Novel_lncRNA	ENSBTAG00000021527	IGF1R	0.961065	3.69132e-05
TCONS_00139850	XLOC_081030	XLOC_081030	Novel_lncRNA	ENSBTAG00000007909	NOTCH2	0.955771	5.73703e-05
TCONS_00139850	XLOC_081030	XLOC_081030	Novel_lncRNA	ENSBTAG00000006519	TNFRSF25	0.96006	4.03165e-05
TCONS_00139850	XLOC_081030	XLOC_081030	Novel_lncRNA	ENSBTAG00000000223	PPM1B	0.96097	3.72249e-05
TCONS_00139850	XLOC_081030	XLOC_081030	Novel_lncRNA	ENSBTAG00000013745	ITGA5	0.973373	9.88273e-06
Chromosome	lncRNA_ID	lncRNA_Gene_ID	lncRNA_Gene_Symbol	lncRNA_Status	lncRNA_Start	lncRNA_End	lncRNA_Strand	Gene_Id	Gene_Symbol	Gene_Start	Gene_End	Gene_Strand	Distance	Location
7	TCONS_00139850	XLOC_081030	XLOC_081030	Novel_lncRNA	17846885	17960439	-	ENSBTAG00000012223	TNFSF14	17839031	17843838	+	3046	downstream
7	TCONS_00139850	XLOC_081030	XLOC_081030	Novel_lncRNA	17846885	17960439	-	ENSBTAG00000009752	CD70	17903864	17908687	+	-4823	antisense
7	TCONS_00139850	XLOC_081030	XLOC_081030	Novel_lncRNA	17846885	17960439	-	ENSBTAG00000046266	TNFSF9	17963470	17966413	-	3031	downstream
7	TCONS_00139850	XLOC_081030	XLOC_081030	Novel_lncRNA	17846885	17960439	-	ENSBTAG00000017280	C3	17773674	17810616	+	36268	downstream
